# Supplementary material for: Genomic Insights into the Distribution of Peptidases and Proteolytic Capacity among Prevotella and Paraprevotella Species
Source: PubMed Central journal article supplement (PMC9045265; doi:10.1128/spectrum.02185-21), 2022-04-04
Supplement: spectrum02185-21_supp_1_seq5.pdf [file spectrum02185-21_supp_1_seq5.pdf]

## SUPPLEMENTAL MATERIALS

Title of the supplementary tables and legend of the figure

**Supplementary Table S1** Different families of peptidases found in *Prevotella* and *Paraprevotella* species/strains. The peptidase families (out of 78 in total) present in less than 50% of the bacterial species/strains are shown.

**Supplementary Table S2** Occurrence of different families of peptidases among the species/strains of *Prevotella* and *Paraprevotella*.

**Supplementary Table S3** Different families of secretory peptidases found in *Prevotella* and *Paraprevotella* species. The secretory peptidase families (out of 48 in total) present in less than 50% of the bacterial species are shown.

**Supplementary Table S4** Occurrence of different families of secretory peptidases among the species/strains of *Prevotella* and *Paraprevotella*.

**Supplementary Table S5** The species and strains of *Prevotella* and *Paraprevotella* and their peptidases analyzed.

**Supplementary Fig. S1** The number (in brackets) and percentage of each catalytic type of peptidases found in the genomes of *Prevotella* and *Paraprevotella* species.

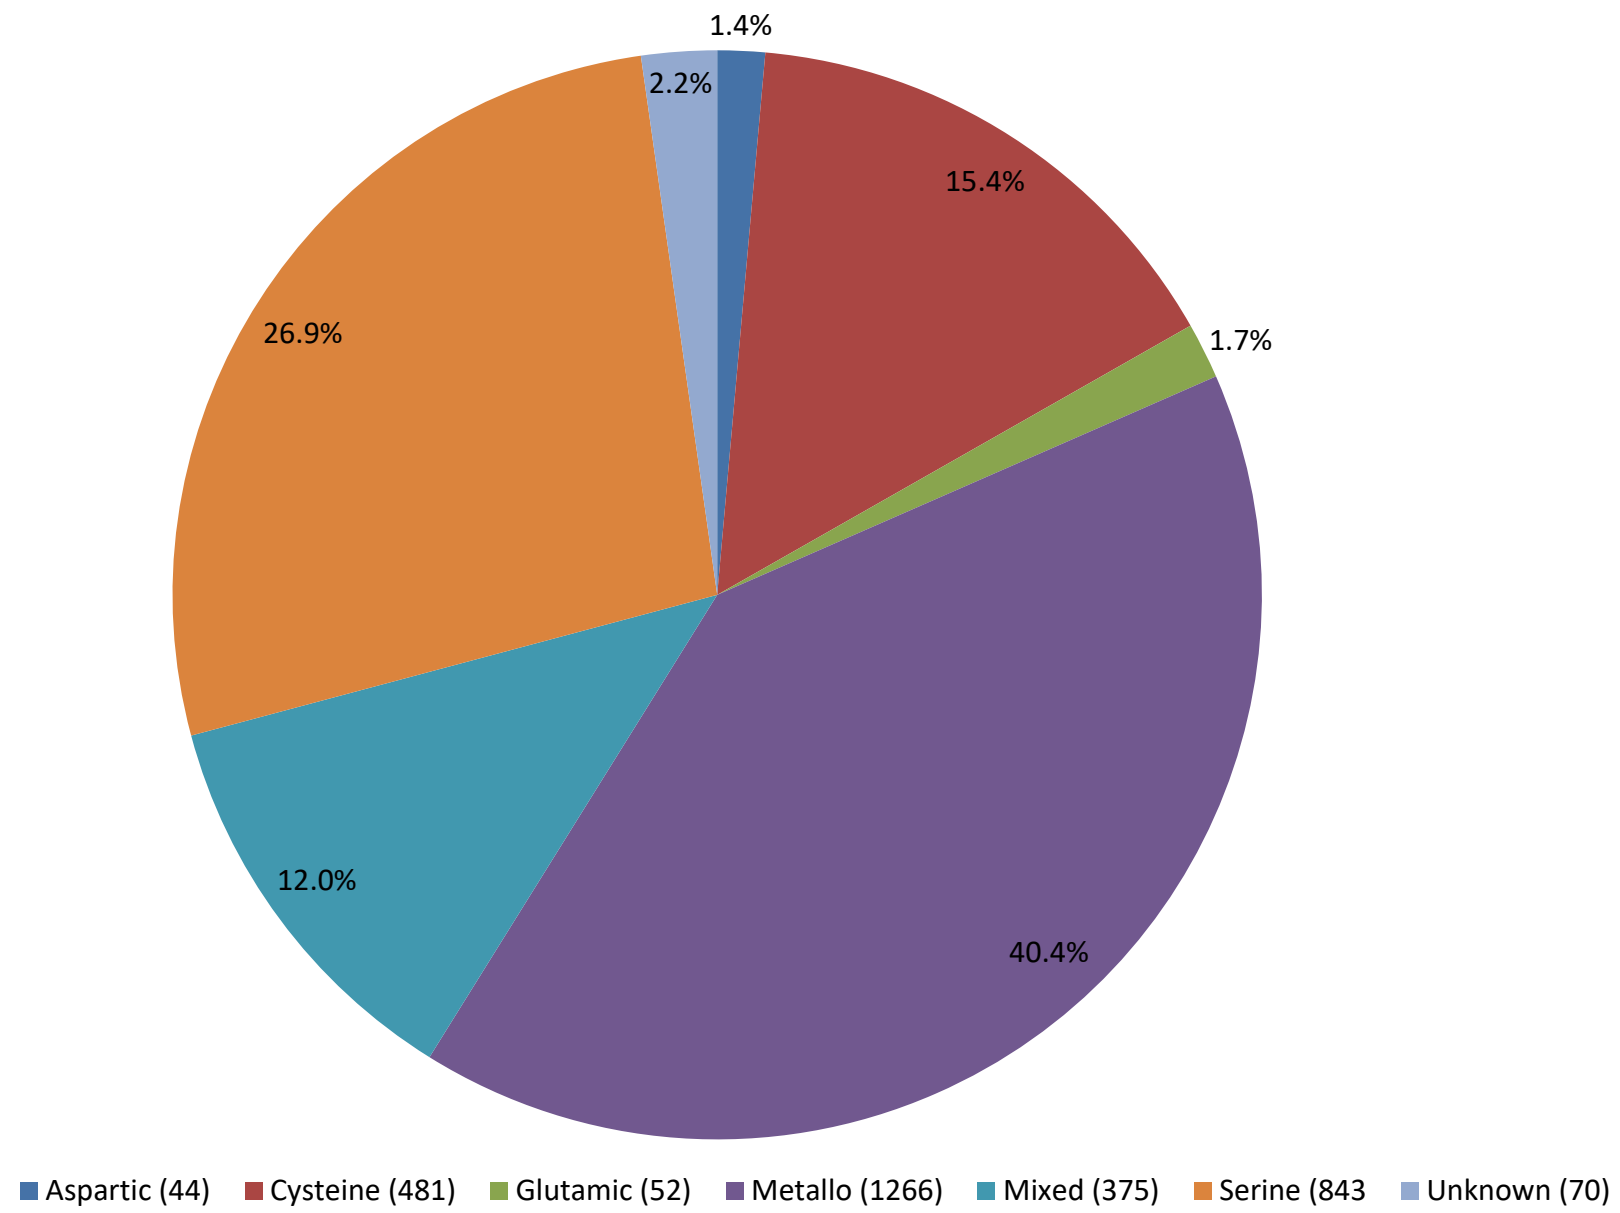

**Supplementary Fig S1** The number (in brackets) and percentage of each catalytic type of peptidases found in the genomes of *Prevotella* and *Paraprevotella* species.

**Supplementary Table S1** Different families of peptidases found in *Prevotella* and *Paraprevotella* species/strains. The peptidase families (out of 78 in total) present in less than 50% of the bacterial species/strains are shown here.

| Peptidase family | Total number | % of total peptidases | Total carrying species/strains | % of total carrying species/strain |
|------------------|--------------|-----------------------|--------------------------------|------------------------------------|
| M56              | 31           | 0.99                  | 22                             | 47.8                               |
| M64              | 22           | 0.70                  | 22                             | 47.8                               |
| S12              | 23           | 0.73                  | 18                             | 39.1                               |
| S24              | 24           | 0.77                  | 17                             | 37.0                               |
| S51              | 19           | 0.61                  | 16                             | 34.8                               |
| C40              | 18           | 0.57                  | 13                             | 28.3                               |
| M97              | 16           | 0.51                  | 13                             | 28.3                               |
| C11              | 11           | 0.35                  | 9                              | 19.6                               |
| C13              | 12           | 0.38                  | 8                              | 17.4                               |
| C44              | 9            | 0.29                  | 8                              | 17.4                               |
| M18              | 8            | 0.26                  | 7                              | 15.2                               |
| M38              | 6            | 0.19                  | 6                              | 13.0                               |
| C56              | 5            | 0.16                  | 5                              | 10.9                               |
| M1               | 5            | 0.16                  | 5                              | 10.9                               |
| M75              | 5            | 0.16                  | 5                              | 10.9                               |
| M78              | 5            | 0.16                  | 5                              | 10.9                               |
| M82              | 5            | 0.16                  | 5                              | 10.9                               |
| C59              | 4            | 0.13                  | 4                              | 8.70                               |
| C51              | 3            | 0.10                  | 3                              | 6.52                               |
| S11              | 3            | 0.10                  | 3                              | 6.52                               |
| S33              | 3            | 0.10                  | 3                              | 6.52                               |
| S66              | 3            | 0.10                  | 3                              | 6.52                               |
| M42              | 4            | 0.13                  | 2                              | 4.35                               |
| C82              | 2            | 0.06                  | 2                              | 4.35                               |
| M12              | 2            | 0.06                  | 2                              | 4.35                               |
| M43              | 2            | 0.06                  | 2                              | 4.35                               |
| M67              | 2            | 0.06                  | 2                              | 4.35                               |
| M86              | 3            | 0.10                  | 1                              | 2.17                               |
| C47              | 2            | 0.06                  | 1                              | 2.17                               |
| A24              | 1            | 0.03                  | 1                              | 2.17                               |
| A32              | 1            | 0.03                  | 1                              | 2.17                               |
| C14              | 1            | 0.03                  | 1                              | 2.17                               |
| C15              | 1            | 0.03                  | 1                              | 2.17                               |
| C60              | 1            | 0.03                  | 1                              | 2.17                               |

|     |   |      |   |      |
|-----|---|------|---|------|
| C75 | 1 | 0.03 | 1 | 2.17 |
| G4  | 1 | 0.03 | 1 | 2.17 |
| M17 | 1 | 0.03 | 1 | 2.17 |
| M29 | 1 | 0.03 | 1 | 2.17 |
| M4  | 1 | 0.03 | 1 | 2.17 |
| N10 | 1 | 0.03 | 1 | 2.17 |
| P1  | 1 | 0.03 | 1 | 2.17 |
| S15 | 1 | 0.03 | 1 | 2.17 |
| S78 | 1 | 0.03 | 1 | 2.17 |
| T1  | 1 | 0.03 | 1 | 2.17 |

**Supplementary Table S3** Different families of secretory peptidases found in *Prevotella* and *Paraprevotella* species. The secretory peptidase families (out of 48 in total) present in less than 50% of the bacterial species are shown here.

| Peptidase family | Total number | % of total secretory peptidases | Total carrying species | % of total carrying species/strains |
|------------------|--------------|---------------------------------|------------------------|-------------------------------------|
| M64              | 20           | 1.40                            | 20                     | 46.5                                |
| S12              | 20           | 1.40                            | 17                     | 39.5                                |
| M97              | 17           | 1.19                            | 13                     | 30.2                                |
| C40              | 16           | 1.12                            | 12                     | 27.9                                |
| C13              | 13           | 0.91                            | 9                      | 20.9                                |
| C11              | 8            | 0.56                            | 7                      | 16.3                                |
| M1               | 5            | 0.35                            | 5                      | 11.6                                |
| M75              | 5            | 0.35                            | 5                      | 11.6                                |
| M49              | 4            | 0.28                            | 4                      | 9.3                                 |
| S51              | 4            | 0.28                            | 4                      | 9.3                                 |
| Unassigned       | 4            | 0.28                            | 4                      | 9.3                                 |
| U32              | 3            | 0.21                            | 3                      | 7.0                                 |
| C59              | 2            | 0.14                            | 2                      | 4.7                                 |
| C82              | 2            | 0.14                            | 2                      | 4.7                                 |
| M12              | 2            | 0.14                            | 2                      | 4.7                                 |
| M43              | 2            | 0.14                            | 2                      | 4.7                                 |
| S11              | 2            | 0.14                            | 2                      | 4.7                                 |
| S54              | 2            | 0.14                            | 2                      | 4.7                                 |
| C47              | 2            | 0.14                            | 1                      | 2.3                                 |
| A32              | 1            | 0.07                            | 1                      | 2.3                                 |
| C39              | 1            | 0.07                            | 1                      | 2.3                                 |
| G4               | 1            | 0.07                            | 1                      | 2.3                                 |
| G5               | 1            | 0.07                            | 1                      | 2.3                                 |
| M19              | 1            | 0.07                            | 1                      | 2.3                                 |
| M4               | 1            | 0.07                            | 1                      | 2.3                                 |
| M86              | 1            | 0.07                            | 1                      | 2.3                                 |
| S15              | 1            | 0.07                            | 1                      | 2.3                                 |
| S16              | 1            | 0.07                            | 1                      | 2.3                                 |
| S26              | 1            | 0.07                            | 1                      | 2.3                                 |
| S33              | 1            | 0.07                            | 1                      | 2.3                                 |
| S66              | 1            | 0.07                            | 1                      | 2.3                                 |
